# Supplementary material
Source: PubMed Central journal article supplement (PMC5283579)
Supplement: EMBR-17-1753-s002.pdf [file EMBR-17-1753-s002.pdf]

Figure 1D

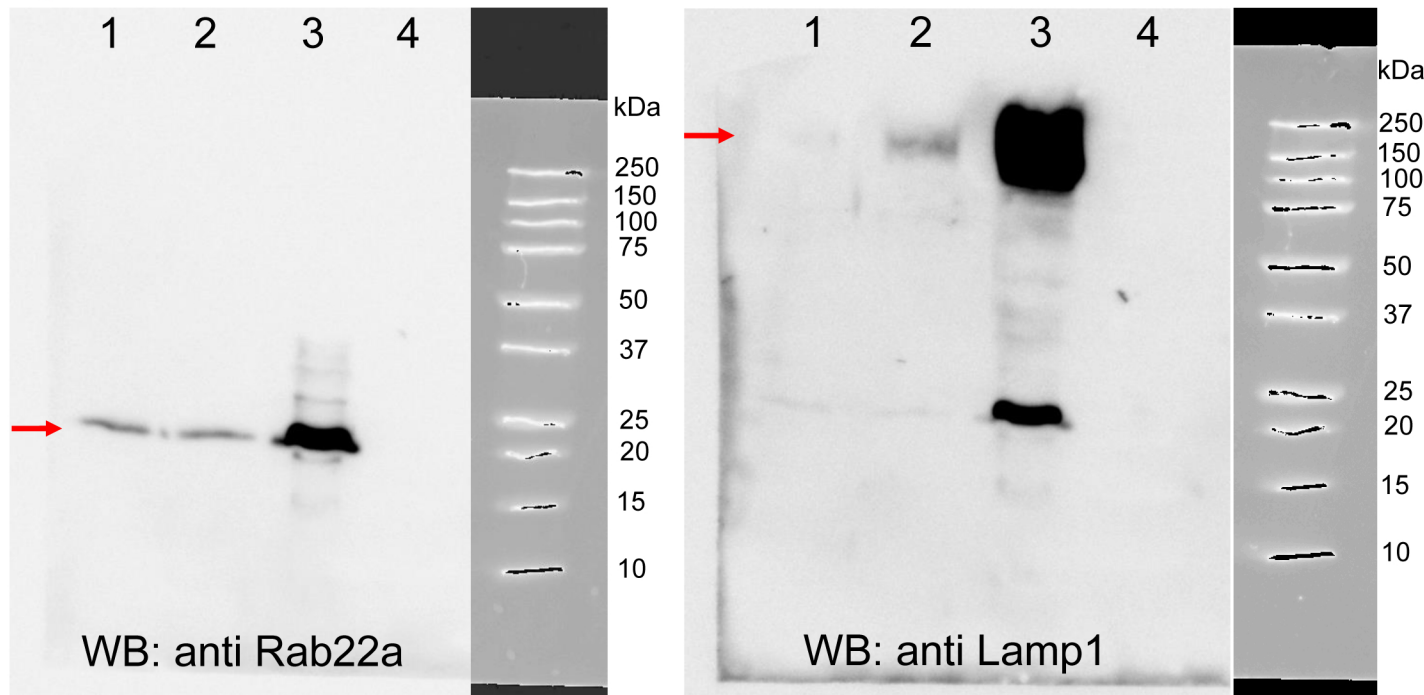

Lane 1: 15' BMDC phagosomes    Lane 2: 60' BMDC phagosomes    Lane 3: BMDC total cell lysate  
Lane 4: Molecular weight marker (Precision Plus Protein All Blue Standards – BIO RAD)
