# Supplementary material
Source: PubMed Central journal article supplement (PMC5283579)
Supplement: EMBR-17-1753-s003.pdf [file EMBR-17-1753-s003.pdf]

Figure 2A

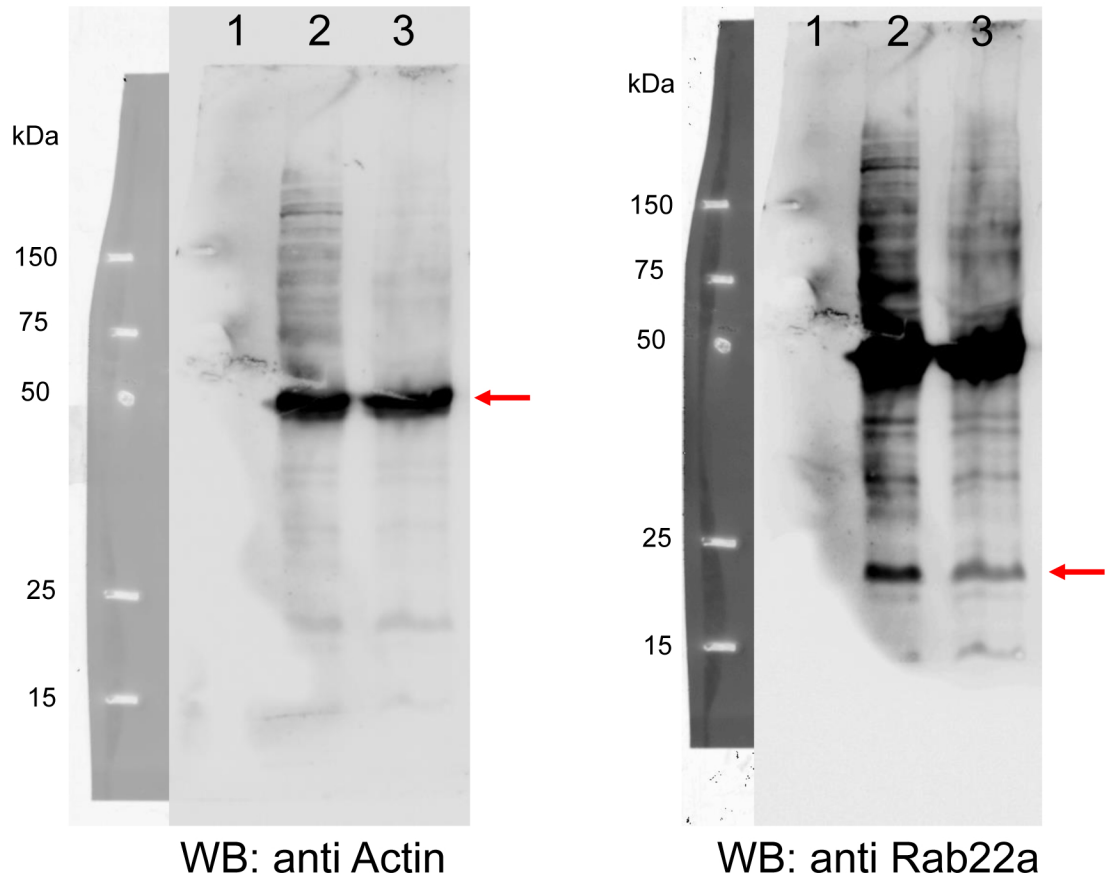

Lane 1: Molecular weight marker (Precision Plus Protein All Blue Standards – BIO RAD)  
Lane 2: Scramble JAWS-II DCs  
Lane 3: Rab22a KD JAWS-II DCs
