# Supplementary material
Source: PubMed Central journal article supplement (PMC5283579)
Supplement: EMBR-17-1753-s004.pdf [file EMBR-17-1753-s004.pdf]

**Figure 3G**

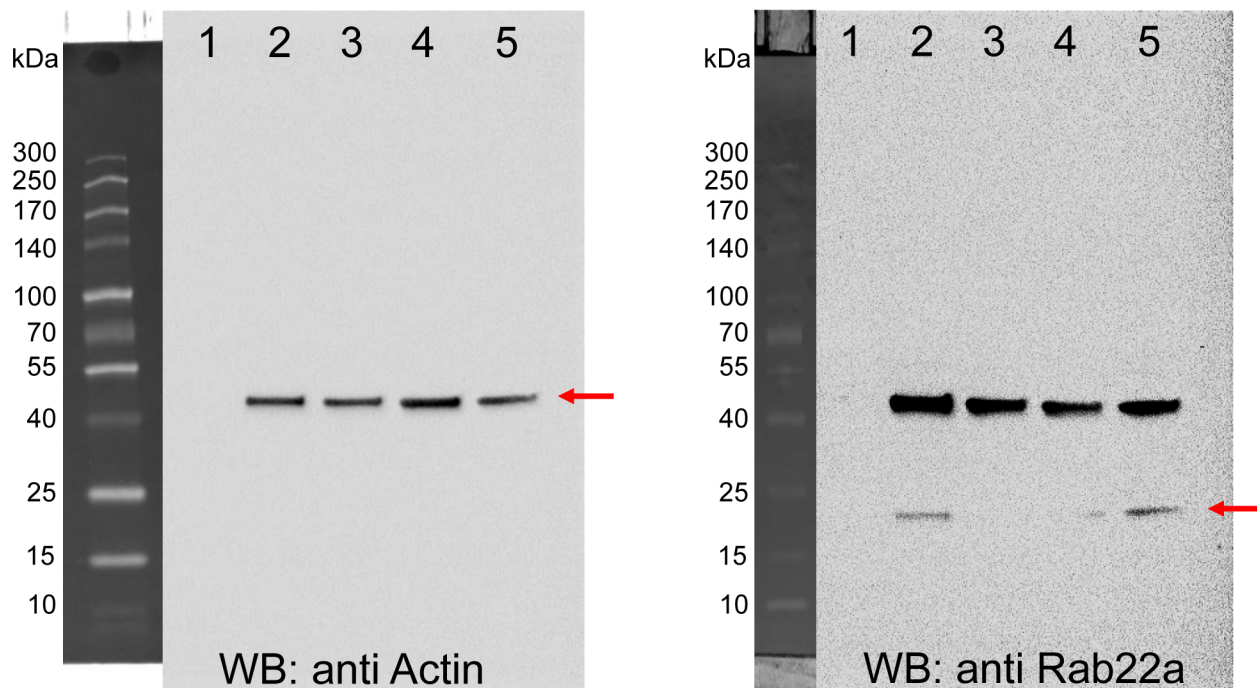

Lane 1: Molecular weight marker (ProSieve QuadColor protein marker, Lonza)  
Lane 2: Scramble BMDCs Lane 3: Rab22a KD #1 BMDCs Lane 4: Rab22a KD #2 BMDCs  
Lane 5: untransduced BMDCs

**Figure 3K**

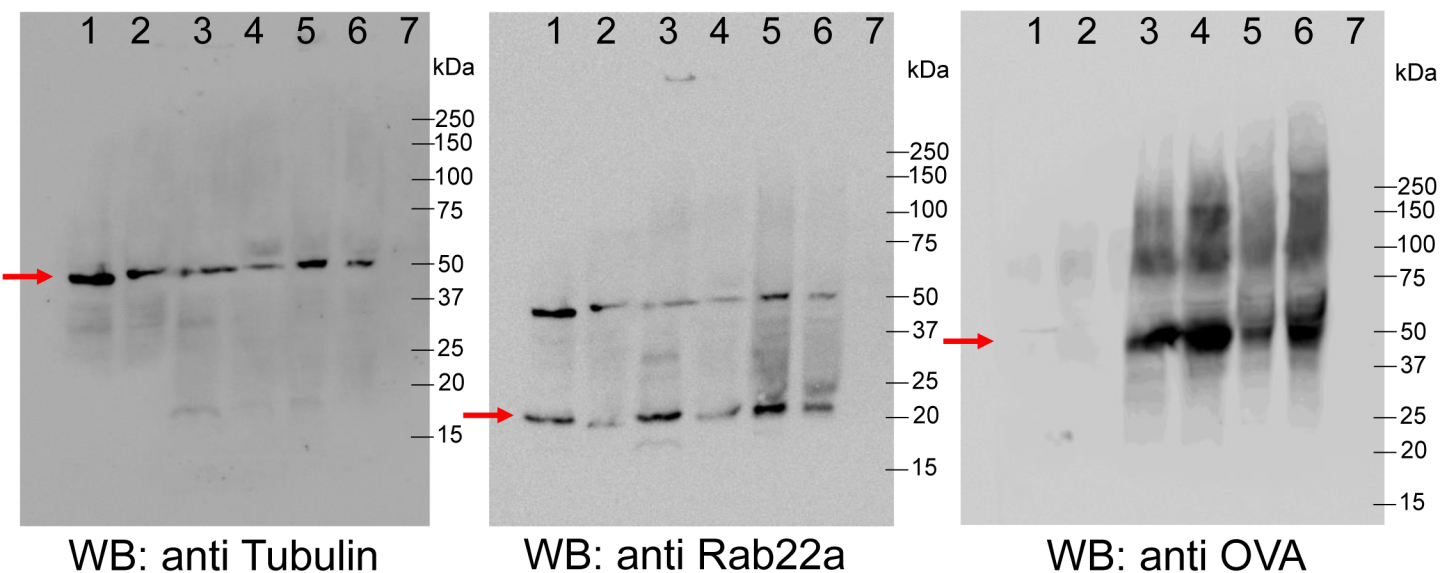

Lane 1: Scramble JAWS-II DCs without treatment  
Lane 2: Rab22a KD JAWS-II DCs without treatment  
Lane 3: Scramble JAWS-II DCs + OVA electroporation  
Lane 4: Rab22a JAWS-II DCs + OVA electroporation  
Lane 5: Scramble JAWS-II DCs + OVA electroporation + BFA  
Lane 6: Rab22a JAWS-II DCs + OVA electroporation + BFA  
Lane 7: Molecular weight marker (Precision Plus Protein All Blue Standards – BIO RAD)
