# Supplementary material
Source: PubMed Central journal article supplement (PMC5283579)
Supplement: EMBR-17-1753-s005.pdf [file EMBR-17-1753-s005.pdf]

# Figure 4D

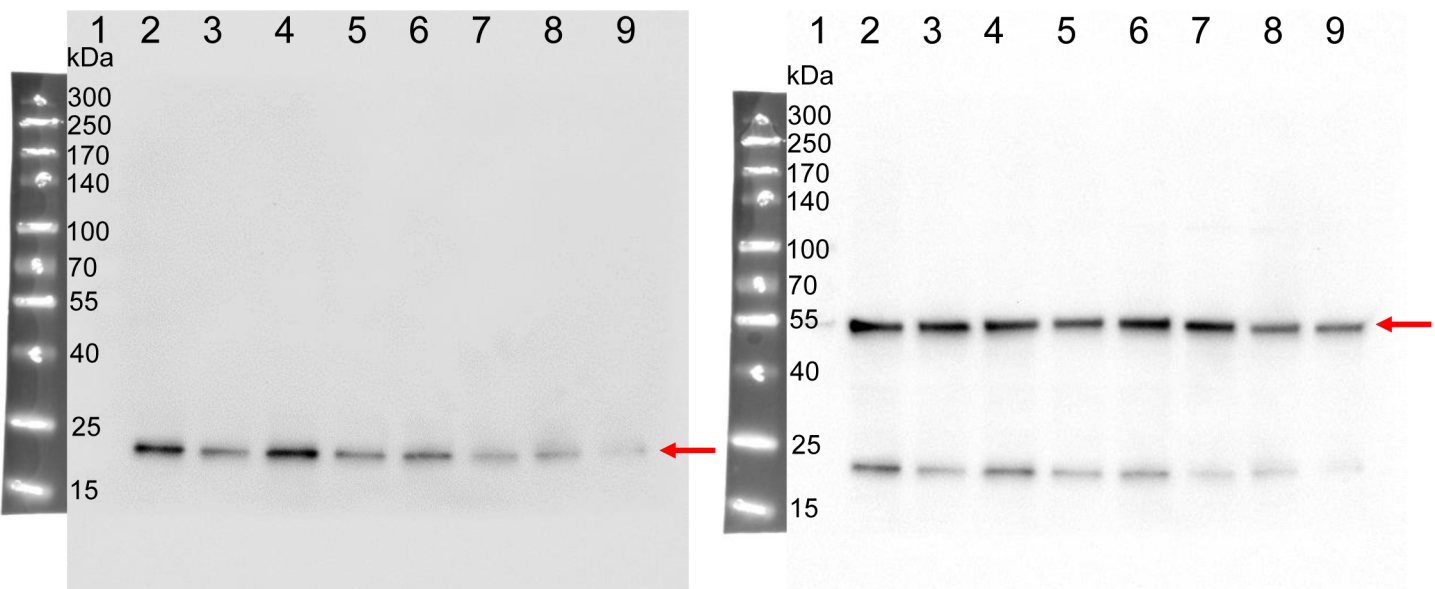

WB: anti Rab22a

WB: anti Tubulin

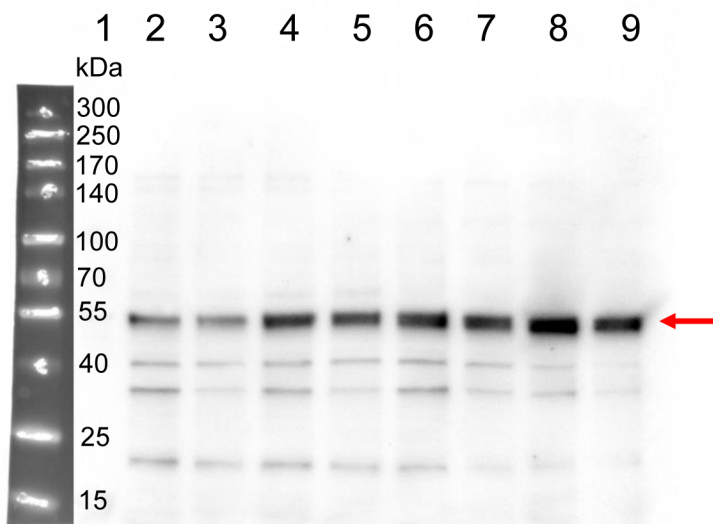

WB: anti OVA

- Lane 1: Molecular weight marker (ProSieve QuadColor protein marker, Lonza)  
Lane 2: Scramble JAWS-II DCs after 90 min post-infection (MOI 2)  
Lane 3: Rab22a KD JAWS-II DCs after 90 min post-infection (MOI 2)  
Lane 4: Scramble JAWS-II DCs after 90 min post-infection (MOI 6)  
Lane 5: Rab22a JAWS-II DCs after 90 min post-infection (MOI 6)  
Lane 6: Scramble JAWS-II DCs after 7 h post-infection (MOI 2)  
Lane 7: Rab22a JAWS-II DCs after 7 h post-infection (MOI 2)  
Lane 8: Scramble JAWS-II DCs after 7 h post-infection (MOI 6)  
Lane 9: Rab22a JAWS-II DCs after 7 h post-infection (MOI 6)
